# Supplementary material for: Newly Developed CK1-Specific Inhibitors Show Specifically Stronger Effects on CK1 Mutants and Colon Cancer Cell Lines
Source: MDPI journal article supplement (doi:10.3390/ijms20246184), 2019-12-07
Supplement: s1 [file s1]

**Supplementary Table 2.** Primers used for site-directed mutagenesis. Sequences of primers used for site-directed mutagenesis of pGEX6-P3 or pcDNA3.1 expression vectors, coding for GST-CK1 $\delta$  and His-CK1 $\delta$ , respectively. Abbreviations: fwd, forward; rev, reverse.

| mutant | nucleotide exchange | primer | primer sequence                                       |
|--------|---------------------|--------|-------------------------------------------------------|
| A36V   | GCC-GTC             | fwd    | 5'-gcaggagaagaggtgtcatcaagcttgaatgtg-3'               |
| A36V   | GCC-GTC             | rev    | 5'-cacattcaagcttgatgacaacctcttctcctgca-3'             |
| L25V   | CTC-CCC             | fwd    | 5'-cttcggagacatctatcccggtagcgacattgctg-3'             |
| L25V   | CTC-CCC             | rev    | 5'-cagcaatgtccgtaccggatagatgtctccgaag-3'              |
| R115H  | CGC-CAC             | fwd    | 5'-cttgctgaccaaagatgatcagtcacatcgaatacattcattcaaag-3' |
| R115H  | CGC-CAC             | rev    | 5'-cttgaatgaatgtattcgatgtgactgatcattggctcagcaag-3'    |
| R127L  | CGG-CTG             | fwd    | 5'-aaagaacttcatccacctggatgtgaagccagaca-3'             |
| R127L  | CGG-CTG             | rev    | 5'-tgtctggcttcacatccaggtggatgaagttctt-3'              |
| R127Q  | CGG-CAG             | fwd    | 5'-aaagaacttcatccaccaggatgtgaagccagaca-3'             |
| R127Q  | CGG-CAG             | rev    | 5'-tgtctggcttcacatcctgggtggatgaagttctt-3'             |
| I148M  | ATC-ATG             | fwd    | 5'-ggcaacctggtgtacatcatggacttcgggct-3'                |
| I148M  | ATC-ATG             | rev    | 5'-agcccgaagtcctatgatgtacaccaggttgcc-3'               |
| R160H  | CGC-CAC             | fwd    | 5'-taccgggatgcacacaccaccagcac-3'                      |
| R160H  | CGC-CAC             | rev    | 5'-gtgctggtgggtgtgtgcatcccgga-3'                      |
| R160P  | CGC-CCC             | fwd    | 5'-taccgggatgcacccaccaccagcac-3'                      |
| R160P  | CGC-CCC             | rev    | 5'-gtgctggtgggtgggtgcatcccgga-3'                      |
| R160S  | CGC-AGC             | fwd    | 5'-taccgggatgcaagcaccaccagcac-3'                      |
| R160S  | CGC-AGC             | rev    | 5'-gtgctggtgggtgcttgcaccccgga-3'                      |
| R168H  | CGT-CAT             | fwd    | 5'-ccagcacatcccctatcatgagaacaagaacctca-3'             |
| R168H  | CGT-CAT             | rev    | 5'-tgaggttcttgttctcatgataggggatgtgctgg-3'             |
| R178W  | CGG-TGG             | fwd    | 5'-cggggacggcgtggtacgcctcc-3'                         |
| R178W  | CGG-TGG             | rev    | 5'-ggaggcgtaccacgccgtccccg-3'                         |
| E247K  | GAA-AAA             | fwd    | 5'-gtaaaggctacccttccaaattgccacatacctg-3'              |
| E247K  | GAA-AAA             | rev    | 5'-caggtatgtggcaaattggaaggtagcctttac-3'               |
| L252P  | CTG-CCG             | fwd    | 5'-cgaatttgccacataccgaatttctgcccgttcct-3'             |
| L252P  | CTG-CCG             | rev    | 5'-aggaacgggcagaaattcgggtatgtggcaaattcg-3'            |
| R299Q  | CGG-CAG             | fwd    | 5'-tgggtccagccaggccgccgatg-3'                         |
| R299Q  | CGG-CAG             | rev    | 5'-catcggcggcctggctggcacca-3'                         |
| R316G  | AGA-GGA             | fwd    | 5'-gaggagcggctgggacactcgcgga-3'                       |
| R316G  | AGA-GGA             | rev    | 5'-tccgcgagtgtcccagccgctcctc-3'                       |
| Q399*  | CAG-TAG             | fwd    | 5'-ctcgcatgtccacctcatagattcctggtcg-3'                 |
| Q399*  | CAG-TAG             | rev    | 5'-cgaccaggaatctatgaggtggacatgcgag-3'                 |

|       |         |     |                                           |
|-------|---------|-----|-------------------------------------------|
| H414Y | CAC-TAC | fwd | 5'-gtcttcagtctgtcgtgtaccgatgaggatccaag-3' |
| H414Y | CAC-TAC | rev | 5'-cttggatcctcatcggtacacgacagactgaagac-3' |
