# Supplementary material for: Newly Developed CK1-Specific Inhibitors Show Specifically Stronger Effects on CK1 Mutants and Colon Cancer Cell Lines
Source: MDPI journal article supplement (doi:10.3390/ijms20246184), 2019-12-07
Supplement: s1 [file s1]

**Supplementary Table 1.** Enzyme kinetic parameters ( $V_{\max}$ ,  $K_M$ ,  $k_{\text{cat}}$ ,  $k_{\text{cat}}/K_M$ ) of CK1 $\delta$  wild type and mutants for three different substrates. Kinetic parameters were determined for CK1 $\delta$  wild type and mutants using either  $\alpha$ -casein, GST- $\beta$ -catenin<sup>1-181</sup>, or GST-p53<sup>1-64</sup> as substrate. Data is presented as mean values  $\pm$  standard deviation (SD) for experiments performed in triplicate. Abbreviations: A, alanine; E, glutamic acid; G, glycine; GST, glutathione S-transferase; H, histidine; I, isoleucine; K, lysine;  $k_{\text{cat}}$ , turn-over number; L, leucine; M, methionine; min, minute;  $\mu\text{M}$ , micromol; P, proline; pmol, picomol; Q, glutamine; R, arginine; S, serine; sec, second; V, valine;  $V_{\max}$ , maximum enzyme reaction velocity; W, tryptophan; WT, wild type; Y, tyrosine; \*, stop codon.

| CK1 $\delta$ mutant | $\alpha$ -casein            |                            |                                          |                                                                 | GST- $\beta$ -catenin <sup>1-181</sup> |                            |                                          |                                                                 | GST- $\beta$ -p53 <sup>1-64</sup> |                            |                                          |                                                                 |
|---------------------|-----------------------------|----------------------------|------------------------------------------|-----------------------------------------------------------------|----------------------------------------|----------------------------|------------------------------------------|-----------------------------------------------------------------|-----------------------------------|----------------------------|------------------------------------------|-----------------------------------------------------------------|
|                     | $V_{\max}$<br>[pmol/min/mg] | $K_M$<br>[ $\mu\text{M}$ ] | $k_{\text{cat}}$<br>[sec <sup>-1</sup> ] | $k_{\text{cat}}/K_M$<br>[sec <sup>-1</sup> $\mu\text{M}^{-1}$ ] | $V_{\max}$<br>[pmol/min/mg]            | $K_M$<br>[ $\mu\text{M}$ ] | $k_{\text{cat}}$<br>[sec <sup>-1</sup> ] | $k_{\text{cat}}/K_M$<br>[sec <sup>-1</sup> $\mu\text{M}^{-1}$ ] | $V_{\max}$<br>[pmol/min/mg]       | $K_M$<br>[ $\mu\text{M}$ ] | $k_{\text{cat}}$<br>[sec <sup>-1</sup> ] | $k_{\text{cat}}/K_M$<br>[sec <sup>-1</sup> $\mu\text{M}^{-1}$ ] |
| WT                  | 336382 $\pm$ 24923          | 11.7 $\pm$ 1.8             | 6051 $\pm$ 1569                          | 482 $\pm$ 121                                                   | 5860 $\pm$ 819                         | 0.50 $\pm$ 0.17            | 100 $\pm$ 8                              | 197 $\pm$ 56                                                    | 4173 $\pm$ 1238                   | 2.25 $\pm$ 1.05            | 49 $\pm$ 12                              | 37.8 $\pm$ 6.7                                                  |
| L25P                | 5113 $\pm$ 300              | 2.2 $\pm$ 0.5              | 86 $\pm$ 7                               | 40 $\pm$ 13                                                     | 580 $\pm$ 74                           | 0.01 $\pm$ 0.03            | 10 $\pm$ 3                               | 620 $\pm$ 620                                                   | 464 $\pm$ 32                      | 0.09 $\pm$ 0.04            | 8 $\pm$ 2                                | 204 $\pm$ 59                                                    |
| A36V                | 814548 $\pm$ 163379         | 12.9 $\pm$ 5.2             | 14772 $\pm$ 4565                         | 1040 $\pm$ 346                                                  | 14993 $\pm$ 2258                       | 0.36 $\pm$ 0.15            | 251 $\pm$ 14                             | 715 $\pm$ 192                                                   | 2267 $\pm$ 327                    | 0.54 $\pm$ 0.22            | 38 $\pm$ 9                               | 72 $\pm$ 6                                                      |
| R115H               | 62918 $\pm$ 7754            | 5.5 $\pm$ 1.9              | 1049 $\pm$ 156                           | 193 $\pm$ 6                                                     | 2145 $\pm$ 352                         | 0.46 $\pm$ 0.19            | 30 $\pm$ 9                               | 145 $\pm$ 115                                                   | 13379 $\pm$ 2539                  | 0.65 $\pm$ 0.31            | 236 $\pm$ 43                             | 333 $\pm$ 120                                                   |
| R127L               | 942637 $\pm$ 614292         | 73 $\pm$ 59                | 10706 $\pm$ 3621                         | 220 $\pm$ 35                                                    | 48345 $\pm$ 13700                      | 0.46 $\pm$ 0.33            | 762 $\pm$ 22                             | 2744 $\pm$ 1333                                                 | 12439 $\pm$ 5139                  | 1.37 $\pm$ 1.06            | 236 $\pm$ 145                            | 281 $\pm$ 284                                                   |
| R127Q               | 1184000 $\pm$ 329292        | 65 $\pm$ 23                | 24638 $\pm$ 11890                        | 306 $\pm$ 42                                                    | 42840 $\pm$ 7692                       | 0.61 $\pm$ 0.25            | 1029 $\pm$ 784                           | 1527 $\pm$ 1063                                                 | 130054 $\pm$ 15720                | 0.17 $\pm$ 0.09            | 2212 $\pm$ 112                           | 8916 $\pm$ 1403                                                 |
| I148M               | 85476 $\pm$ 11630           | 16 $\pm$ 4                 | 1430 $\pm$ 193                           | 92 $\pm$ 11                                                     | 267 $\pm$ 41                           | 0.24 $\pm$ 0.13            | 6 $\pm$ 4                                | 25 $\pm$ 17                                                     | 387 $\pm$ 87                      | 0.48 $\pm$ 0.31            | 14 $\pm$ 17                              | 17 $\pm$ 13                                                     |
| R160H               | 132275 $\pm$ 24227          | 10 $\pm$ 4                 | 1593 $\pm$ 391                           | 254 $\pm$ 120                                                   | 5227 $\pm$ 978                         | 0.81 $\pm$ 0.30            | 91 $\pm$ 20                              | 111 $\pm$ 30                                                    | 414 $\pm$ 114                     | 0.70 $\pm$ 0.47            | 8 $\pm$ 3                                | 10 $\pm$ 4                                                      |
| R160P               | 156772 $\pm$ 16423          | 6.1 $\pm$ 1.7              | 2722 $\pm$ 650                           | 436 $\pm$ 119                                                   | 511 $\pm$ 71                           | 0.43 $\pm$ 0.16            | 9 $\pm$ 2                                | 20 $\pm$ 7                                                      | 1754 $\pm$ 263                    | 0.48 $\pm$ 0.20            | 30 $\pm$ 10                              | 74 $\pm$ 35                                                     |
| R160S               | 174988 $\pm$ 27722          | 15 $\pm$ 5                 | 2361 $\pm$ 579                           | 201 $\pm$ 83                                                    | 591 $\pm$ 90                           | 0.47 $\pm$ 0.18            | 11 $\pm$ 2                               | 22 $\pm$ 10                                                     | 601 $\pm$ 182                     | 1.05 $\pm$ 0.66            | 11 $\pm$ 4                               | 10 $\pm$ 4                                                      |
| R168H               | 488699 $\pm$ 130163         | 36 $\pm$ 14                | 5043 $\pm$ 255                           | 279 $\pm$ 3                                                     | 4769 $\pm$ 334                         | 0.10 $\pm$ 0.03            | 81 $\pm$ 14                              | 1543 $\pm$ 255                                                  | 5510 $\pm$ 2                      | 0.87 $\pm$ 0.01            | 101 $\pm$ 36                             | 116 $\pm$ 47                                                    |
| R178W               | 19880 $\pm$ 1651            | 9.7 $\pm$ 1.8              | 336 $\pm$ 27                             | 34 $\pm$ 4                                                      | 2397 $\pm$ 212                         | 0.19 $\pm$ 0.06            | 42 $\pm$ 10                              | 226 $\pm$ 98                                                    | 1336 $\pm$ 193                    | 1.30 $\pm$ 0.36            | 23 $\pm$ 6                               | 17 $\pm$ 4                                                      |
| E247K               | 243 $\pm$ 30                | 1.8 $\pm$ 1.0              | 6 $\pm$ 2                                | 0.6 $\pm$ 0.3                                                   | 74 $\pm$ 12                            | 0.01 $\pm$ 0.03            | 1.3 $\pm$ 0.4                            | 110 $\pm$ 69                                                    | 98 $\pm$ 4                        | 0.01 $\pm$ 0.01            | 1.5 $\pm$ 0.1                            | 278 $\pm$ 22                                                    |
| L252P               | 195 $\pm$ 37                | 1.1 $\pm$ 1.0              | 3.3 $\pm$ 0.2                            | 3 $\pm$ 1                                                       | 46 $\pm$ 3                             | 0.01 $\pm$ 0.01            | 0.8 $\pm$ 0.1                            | 143 $\pm$ 15                                                    | 34 $\pm$ 2                        | 0.01 $\pm$ 0.01            | 0.6 $\pm$ 0.1                            | 29 $\pm$ 9                                                      |
| R299Q               | 705191 $\pm$ 127744         | 33 $\pm$ 9                 | 13270 $\pm$ 5087                         | 364 $\pm$ 98                                                    | 9545 $\pm$ 4369                        | 1.84 $\pm$ 1.27            | 123 $\pm$ 43                             | 127 $\pm$ 44                                                    | 4471 $\pm$ 1157                   | 2.45 $\pm$ 0.97            | 79 $\pm$ 22                              | 31 $\pm$ 5                                                      |
| R316G               | 191294 $\pm$ 20894          | 21 $\pm$ 4                 | 3208 $\pm$ 263                           | 155 $\pm$ 22                                                    | 2527 $\pm$ 740                         | 1.57 $\pm$ 0.73            | 44 $\pm$ 15                              | 28 $\pm$ 6                                                      | 880 $\pm$ 192                     | 0.74 $\pm$ 0.39            | 15 $\pm$ 3                               | 20 $\pm$ 1                                                      |
| Q399*               | 413321 $\pm$ 104175         | 35 $\pm$ 13                | 7190 $\pm$ 2191                          | 197 $\pm$ 20                                                    | 3701 $\pm$ 1412                        | 1.20 $\pm$ 0.79            | 46 $\pm$ 18                              | 61 $\pm$ 19                                                     | 2250 $\pm$ 1442                   | 3.17 $\pm$ 2.86            | 25 $\pm$ 1                               | 17 $\pm$ 1                                                      |
| H414Y               | 110421 $\pm$ 33216          | 26 $\pm$ 12                | 1999 $\pm$ 459                           | 73 $\pm$ 25                                                     | 1525 $\pm$ 411                         | 1.74 $\pm$ 0.72            | 26 $\pm$ 5                               | 15 $\pm$ 2                                                      | 410 $\pm$ 83                      | 0.68 $\pm$ 0.34            | 7 $\pm$ 1                                | 10 $\pm$ 2                                                      |
